# Supplementary material for: Development of multifactor index for assessing quality of life of a tribal population of India: multilevel analysis approach
Source: Springer Nature journal article supplement (doi:10.1186/s12889-021-10338-2), 2021-02-18
Supplement: MOESM1 [file 18879396]

**School of Public Health, SRM University****Quality of life of Tribal People:****Development of Individual, Household and Community based Multi-Factor Indices  
Funded By ICMR**

**பழங்குடி மக்களின் வாழ்க்கைத் தரம்: தனிநபர், குடும்பம் மற்றும் சமூகம் சார்ந்த  
பன்முக குறியீடுகள் உருவாக்கம்**

I1. Household Questionnaire Number:

(குடும்ப வினாத்தாள் வரிசை எண்)

|  |  |  |  |
|--|--|--|--|
|  |  |  |  |
|--|--|--|--|

|                                             |           |                                                    |  |
|---------------------------------------------|-----------|----------------------------------------------------|--|
| I2. State<br>மாநிலம்                        | தமிழ்நாடு | I3. District:<br>மாவட்டம்                          |  |
| I4. Taluk<br>வட்டாரம்                       |           | I5. Town/Village/நகரம்/கிராமம்<br>பெயர்            |  |
| I6. Door No<br>கதவு எண்                     |           | I7. Name of Household<br>Head/குடும்ப தலைவர் பெயர் |  |
| I8. Tribe Name /<br>மலைவாழ்<br>மக்கள் பெயர் |           | I9. Sub Tribe Name/மலைவாழ்<br>மக்கள் துணைப்பெயர்   |  |

I10. Status of interview (பேட்டியின் முடிவு)

|                                                                | No of Eligible<br>Respondents<br>தகுதி வாய்ந்த<br>பதிலளிப்பவர்<br>எண்ணிக்கை | Completed<br>பூர்த்தி<br>செய்யப்பட்டவை | No Eligible<br>respondent<br>தகுதி வாய்ந்த<br>பதிலளிப்பவர்<br>இல்லை | Refused<br>மறுப்பு | Others<br>மற்றவை |
|----------------------------------------------------------------|-----------------------------------------------------------------------------|----------------------------------------|---------------------------------------------------------------------|--------------------|------------------|
| Household (Head)<br>குடும்பத் தலைவர்                           |                                                                             |                                        |                                                                     |                    |                  |
| Women (Age 15 - 49)<br>பெண்கள் 15 வயது 49<br>முதல் வயது வரை    |                                                                             |                                        |                                                                     |                    |                  |
| Male (> 19) ஆண்கள் (19<br>வயதிற்கு மேற்பட்டோர்)                |                                                                             |                                        |                                                                     |                    |                  |
| Adolescent(≤19)<br>விடலைப் பருவம்) 19<br>வயதிற்கு கீழ் உள்ளோர் |                                                                             |                                        |                                                                     |                    |                  |
| Elders (≥ 60)<br>முதியோர் (60 வயதிற்கு<br>மேற்பட்டோர்)         |                                                                             |                                        |                                                                     |                    |                  |

I11. Line No of Respondent to Household Questionnaire

(குடும்ப வினாத்தாளுக்கு பதிலளிப்பவரின் வரிசை எண்)

|  |  |
|--|--|
|  |  |
|--|--|

I12. Total Number of Household Members

வீட்டு உறுப்பினர் எண்ணிக்கை

|  |  |
|--|--|
|  |  |
|--|--|

|                                                        |  |                                                   |  |
|--------------------------------------------------------|--|---------------------------------------------------|--|
| I13. Date of Interview<br>பேட்டி எடுக்கும் தேதி        |  | I14. Time of Interview<br>பேட்டி எடுக்கும் நேரம்  |  |
| I15. Field Investigator Code<br>கள ஆய்வாளரின் குறியீடு |  | I16. Supervisor Code<br>கண்காணிப்பாளரின் குறியீடு |  |



**Code for (H2)**

01=Male ஆண்  
02=Female பெண்

**Code for (H3)**

01=Single மணமாகாதவர்  
02=Married மணமானவர்  
03=Other /மற்றவை

**Code for (H5)**

01=Yes ஆம்  
02=No இல்லை

**Code for (H7)**

01=Yes ஆம்  
02=No இல்லை

**Code for (H9)**

01=Education not considered as necessary/கல்வி அவசியம் என கருதவில்லை  
02=Required for household work / family business/care of siblings/குடும்ப வேலையினால்/ குலத்தொழில் செய்ய / சகோதரர்களை கவனித்துக் கொள்ள  
03=Need to work for payment or kind/பணம் அல்லது உணவுக்காக வேலை செய்ய வேண்டி நேர்ந்தது  
04= Repeated failures/அடுத்தடுத்த தோல்விகள்  
05= Got married/ திருமணம்  
06= Others/ மற்றவைகள்

**Code for (H10)**

01= Government/அரசாங்கம்  
02= Private/தனியார்  
03= Anganwadi/பால்வாடி  
04=Tribal/social welfare schools/மலைவாழ் மக்கள் / சமூக நலப் பள்ளி  
05= NGO schools (open schools)/அரசு சாரா நிறுவன பள்ளி

**Code for (H11)**

01= Foot/நடந்து  
02= Cycle/மிதிவண்டி  
03= Motorized Transport மோட்டர்/வாகனம்  
04= Public Transportation/  
05 = other/மற்றவை

**Code for (HH12)**

01= Agriculture/விவசாயம்  
02=Labour /கூலி வேலை  
03=Salaried Employment/ஊதியம் சார்ந்த வேலைவாய்ப்பு  
04=Business/ வியாபாரம்  
05=Unemployed/வேலையில்லாதவர்  
06=Student/மாணவர்  
07=House wife/இல்லத்தரசி  
08=Retired/ஓய்வுபெற்றவர்  
09=Others/மற்றவைகள்

## HOUSEHOLD CHARACTERISTICS

| Q.NO | QUESTIONS                                                                                                               | CATEGORIES                                                                                                                                                                                  | CODING                                                                                                                                                         | SKIP TO |  |  |
|------|-------------------------------------------------------------------------------------------------------------------------|---------------------------------------------------------------------------------------------------------------------------------------------------------------------------------------------|----------------------------------------------------------------------------------------------------------------------------------------------------------------|---------|--|--|
| H16  | Type of family<br>(குடும்ப வகை)                                                                                         | Nuclear Family/தனிக் குடும்பம் _____ 1<br>Joint Family/கூட்டுக் குடும்பம் _____ 2                                                                                                           |                                                                                                                                                                |         |  |  |
| H17  | Religion<br>மதம்                                                                                                        | Hindu/இந்து _____ 1<br>Muslim/முஸ்லிம் _____ 2<br>Christian/கிறிஸ்தியன் _____ 3<br>Others/மற்றவர்கள் _____ 4                                                                                |                                                                                                                                                                |         |  |  |
| H18  | Do you or any member of your household own this house? உங்களுக்கோ அல்லது குடும்பத்தில் உள்ள மற்றவருக்கோ இது சொந்த வீடா? | Own house/ சொந்த வீடு _____ 1<br>Tenant வாடகை _____ 2<br>Others மற்றவை _____ 3<br>(குறிப்பிடவும்) (mention)<br>.....                                                                        |                                                                                                                                                                |         |  |  |
| H19  | How many rooms are there?<br>வீட்டில் எத்தனை அறைகள் உள்ளன?                                                              | Number of rooms<br>அறைகளின் எண்ணிக்கை                                                                                                                                                       | <table border="1" style="display: inline-table; width: 50px; height: 20px;"> <tr> <td style="width: 25px;"></td> <td style="width: 25px;"></td> </tr> </table> |         |  |  |
|      |                                                                                                                         |                                                                                                                                                                                             |                                                                                                                                                                |         |  |  |
| H20  | Type of House (Record Observation)<br>வீட்டின் அமைப்பு (பார்த்து பதிவு செய்க)                                           | Pucca /பக்கா _____ 1<br>Semi Pucca /செமி பக்கா _____ 2<br>Kachcha/கச்சா _____ 3                                                                                                             |                                                                                                                                                                |         |  |  |
| H21  | What fuel is used for cooking?<br>சமைப்பதற்கு என்ன வகையான எரிபொருள் பயன்படுத்தப்படுகிறது?                               | LP Gas/சமையல் எரிவாயு _____ 1<br>Kerosene/மண்ணெண்ணெய் _____ 2<br>Wood or charcoal/ விறகு / கரி _____ 3<br>Dung Cake /வரட்டி _____ 4<br>Other(specify / மற்றவை/குறிப்பிடுக) _____ 5<br>..... |                                                                                                                                                                |         |  |  |
| H22a | Does your household have electricity? உங்கள் வீட்டில் மின்சாரவசதி உள்ளதா?                                               | Yes/ஆம் _____ 1 →<br>No/இல்லை _____ 2                                                                                                                                                       |                                                                                                                                                                | H23     |  |  |
| H22b | Source of lighting<br>வெளிச்சதிற்கான மூலதனம்                                                                            | Gas/எரிவாயு _____ 1<br>Oil//எண்ணெய் _____ 2<br>Kerosene/மண்ணெண்ணெய் _____ 3<br>Others(மற்றவை) _____ 4<br>.....                                                                              |                                                                                                                                                                |         |  |  |
| H23  | Is there a kitchen in your house? உங்கள் வீட்டில் சமையலறை உள்ளதா?                                                       | Yes/ஆம் _____ 1<br>No/இல்லை _____ 2                                                                                                                                                         |                                                                                                                                                                |         |  |  |
| H24  | Where do you usually cook?<br>வழக்கமாக சமையல் எங்கு செய்யப்படுகிறது?                                                    | In the house/வீட்டில் _____ 1<br>In a separate building/வேறு வீட்டில் _____ 2<br>Outdoors/வெளியே _____ 3<br>Other/மற்றவை _____ 4<br>(குறிப்பிடுக).....                                      |                                                                                                                                                                |         |  |  |

|                                           |                                                                                                           |                                                                                                             |                      |    |       |
|-------------------------------------------|-----------------------------------------------------------------------------------------------------------|-------------------------------------------------------------------------------------------------------------|----------------------|----|-------|
| H25                                       | List the things you have in your household:<br>உங்கள் வீட்டில் உள்ள பொருள்கள்                             |                                                                                                             | Yes                  | No | Count |
|                                           |                                                                                                           | Radio / வானொலி                                                                                              | 1                    | 2  |       |
|                                           |                                                                                                           | Television (colour)/ வண்ண தொலைக்காட்சி                                                                      | 1                    | 2  |       |
|                                           |                                                                                                           | Landline/ தொலைபேசி                                                                                          | 1                    | 2  |       |
|                                           |                                                                                                           | Mobile telephone /கைப்பேசி                                                                                  | 1                    | 2  |       |
|                                           |                                                                                                           | Ceiling fan /மின்விசிறி                                                                                     | 1                    | 2  |       |
|                                           |                                                                                                           | Table fan /மேசை விசிறி                                                                                      | 1                    | 2  |       |
|                                           |                                                                                                           | Chair /நாற்காலி                                                                                             | 1                    | 2  |       |
|                                           |                                                                                                           | Cot/Bed கட்டில் / படுக்கை                                                                                   | 1                    | 2  |       |
|                                           |                                                                                                           | Mattress /மெத்தை                                                                                            | 1                    | 2  |       |
|                                           |                                                                                                           | Sewing machine/ தையல் இயந்திரம்                                                                             | 1                    | 2  |       |
|                                           |                                                                                                           | Pressure cooker/ குக்கர்                                                                                    | 1                    | 2  |       |
|                                           |                                                                                                           | Grinder /அரைக்கும் இயந்திரம்                                                                                | 1                    | 2  |       |
|                                           |                                                                                                           | Mixie /மிக்கி                                                                                               | 1                    | 2  |       |
|                                           |                                                                                                           | DVD/VCD Player /டிவிடி ப்ளேயர்                                                                              | 1                    | 2  |       |
|                                           |                                                                                                           | DTH/டிஷ் ஆண்டெனா                                                                                            | 1                    | 2  |       |
|                                           |                                                                                                           | Table/மேசை                                                                                                  | 1                    | 2  |       |
|                                           |                                                                                                           | Wall clock/ சுவர் கடிகாரம்                                                                                  | 1                    | 2  |       |
|                                           |                                                                                                           | Wardrobe/ டீரோ                                                                                              | 1                    | 2  |       |
|                                           |                                                                                                           | Bicycle/ மிதிவண்டி                                                                                          | 1                    | 2  |       |
|                                           |                                                                                                           | Water pump தண்ணீர்                                                                                          | 1                    | 2  |       |
| Motorcycle or Scooter இருசக்கர வாகனம்     | 1                                                                                                         | 2                                                                                                           |                      |    |       |
| Animal-drawn Cart விலங்கு இழுக்கும் வண்டி | 1                                                                                                         | 2                                                                                                           |                      |    |       |
| Tractor / ட்ராக்டர்                       | 1                                                                                                         | 2                                                                                                           |                      |    |       |
| Car/Jeep/JCB/Truck / கார் / ஜீப்          | 1                                                                                                         | 2                                                                                                           |                      |    |       |
| Other/மற்றவை(குறுப்பிடவும்)               | .....                                                                                                     |                                                                                                             |                      |    |       |
|                                           |                                                                                                           |                                                                                                             |                      |    |       |
| H26                                       | Does your household own any farming lands?<br>இந்த குடும்பத்திற்கு ஏதேனும் விவசாய நிலம் உள்ளதா?           | Yes/ ஆம் _____ 1<br>No/ இல்லை _____ 2 →                                                                     |                      |    | H29   |
| H27                                       | How much area of farming land does this household own?<br>எவ்வளவு விவசாய நிலம் உள்ளது?                    | Acres (ஏக்கர்)<br>If not in acres; specify in some Unit<br>(ஏக்கரில் இல்லையெனில் மற்ற அலகில் குறிப்பிடவும்) | <input type="text"/> |    |       |
| H28                                       | How much area of this farm is irrigated?<br>இதில் எவ்வளவு நீர் பாயக்கூடியது?                              | Acres(ஏக்கர்)<br>If not in acres; specify in some Unit<br>(ஏக்கரில் இல்லையெனில் மற்ற அலகில் குறிப்பிடவும்)  | <input type="text"/> |    |       |
| H29                                       | Does your household own any livestock?<br>இந்த வீட்டில் ஏதேனும் ஆடு, மாடு, கோழி போன்ற விலங்குகள் உள்ளனவா? | Yes/ஆம் _____ 1<br>No/இல்லை _____ 2 →                                                                       |                      |    | H31   |

|     |                                                                                                                                                                                              |                                                                                                                                                                                                                                                                                                                                                                         |       |    |
|-----|----------------------------------------------------------------------------------------------------------------------------------------------------------------------------------------------|-------------------------------------------------------------------------------------------------------------------------------------------------------------------------------------------------------------------------------------------------------------------------------------------------------------------------------------------------------------------------|-------|----|
| H30 | What are all the animals in the list?<br>பட்டியலில் உள்ள என்னென்ன விலங்குகள் உள்ளன?                                                                                                          |                                                                                                                                                                                                                                                                                                                                                                         | Yes   | No |
|     |                                                                                                                                                                                              | Cows/Bufallos/Bulls-மாடு/எருமை/காளை                                                                                                                                                                                                                                                                                                                                     | 1     | 2  |
|     |                                                                                                                                                                                              | Horses/Donkeys குதிரை/கழுதை                                                                                                                                                                                                                                                                                                                                             | 1     | 2  |
|     |                                                                                                                                                                                              | Goats/வெள்ளாடு                                                                                                                                                                                                                                                                                                                                                          | 1     | 2  |
|     |                                                                                                                                                                                              | Sheep/செம்மறியாடு                                                                                                                                                                                                                                                                                                                                                       | 1     | 2  |
|     |                                                                                                                                                                                              | Chickens/ Ducks /கோழி/வாத்து                                                                                                                                                                                                                                                                                                                                            | 1     | 2  |
|     |                                                                                                                                                                                              | Pigs/பன்றி                                                                                                                                                                                                                                                                                                                                                              | 1     | 2  |
| H31 | Does anyone in this household hold a savings account / bank savings account / postal savings account? குடும்பத்தில் யாரேனும் வங்கி, தபால் அலுவலக அல்லது சிறுசேமிப்பு கணக்கு வைத்துள்ளார்களா? | Yes/ஆம் _____ 1                                                                                                                                                                                                                                                                                                                                                         | → H33 |    |
|     |                                                                                                                                                                                              | No/இல்லை _____ 2                                                                                                                                                                                                                                                                                                                                                        |       |    |
| H32 | How many members have the account? எத்தனை பேர் வைத்துள்ளார்கள்?                                                                                                                              | Male /ஆண்கள் <input type="text"/> <input type="text"/>                                                                                                                                                                                                                                                                                                                  |       |    |
|     |                                                                                                                                                                                              | Female/பெண்கள் <input type="text"/> <input type="text"/>                                                                                                                                                                                                                                                                                                                |       |    |
| H33 | Does anyone in your household read newspaper? குடும்பத்தில் யாருக்கேனும் செய்தித்தாள் படிக்கும் வழக்கம் உள்ளதா?                                                                              | Yes/ஆம் _____ 1<br>No/இல்லை _____ 2                                                                                                                                                                                                                                                                                                                                     |       |    |
| H34 | What is the main source of water supply for this family? குடும்பத்திற்கான முக்கிய நீர் ஆதாரம் என்ன?                                                                                          | Piped water in residence குழாய் தண்ணீர் (வீட்டிலேயே) _____ 1<br>Well water in residence கிணற்று தண்ணீர்(வீட்டிலேயே) _____ 2<br>Public tap in residence/பொது குழாய் (வீட்டிலேயே) _____ 3<br>Public tap/ பொது குழாய் _____ 4<br>Public well water / பொது கிணறு _____ 5<br>Pond/குளம் _____ 6<br>Tanker truck தண்ணி லாரி _____ 7<br>Others/மற்றவை _____ 8<br>(குறுப்பிடுக) |       |    |
| H35 | Does your household get uninterrupted water supply? உங்கள் வீட்டில் தங்குதடையின்றி தண்ணீர் வரத்து உள்ளதா?                                                                                    | Yes/ஆம் _____ 1<br>No/இல்லை _____ 2                                                                                                                                                                                                                                                                                                                                     |       |    |
| H36 | How much time does it take to collect/fetch water? தண்ணீர் சேகரிக்க/ பிடிக்க எவ்வளவு நேரம் ஆகும்?                                                                                            |                                                                                                                                                                                                                                                                                                                                                                         |       |    |
| H37 | From your family, who regularly fetches water? உங்கள் குடும்பத்தில் வழக்கமாக யார் தண்ணீர் பிடிக்க செல்வார்கள்?                                                                               | Woman/பெண்கள் _____ 1<br>Man /ஆண்கள் _____ 2<br>Children /குழந்தைகள் _____ 3<br>All/அனைவரும் _____ 4                                                                                                                                                                                                                                                                    |       |    |

|     |                                                                                                                                                                                        |                                                                                                                                                                                             |
|-----|----------------------------------------------------------------------------------------------------------------------------------------------------------------------------------------|---------------------------------------------------------------------------------------------------------------------------------------------------------------------------------------------|
| H38 | Do you treat your water to make it safer to drink?<br>குடிப்பதற்கு பாதுகாப்பான தண்ணீரை பெறும் வகையில் உங்கள் தண்ணீரை எதாவது வழிமுறையில் சுத்திகரிப்பு செய்கிறீர்களா?                   | Yes/ஆம் _____ 1<br>No/இல்லை _____ 2 → H40<br>Occasional/ எப்போதாவது _____ 3                                                                                                                 |
| H39 | How do you treat your drinking water?<br>குடிநீரை சுத்தப்படுத்த என்ன செய்வீர்கள்?                                                                                                      | Strain by cloth துணியால் வடிகட்டுதல் _____ 1<br>Use a water filter தண்ணீர் வடிகட்டி பயன்படுத்துதல் _____ 2<br>Boiling கொதிக்கவைத்தல் _____ 3<br>Others/மற்றவை _____ 4<br>(குறிப்பிடுக)..... |
| H40 | Does your house have toilet facilities?உங்கள் வீட்டில் கழிப்பிட வசதி உள்ளதா?                                                                                                           | Yes/ஆம் _____ 1<br>No /இல்லை _____ 2 → H43                                                                                                                                                  |
| H41 | What type of toilet facility is there?<br>என்ன வகையான கழிப்பிட வசதி உள்ளது?                                                                                                            | Flush Latrine / ப்ளஷ் டாய்லெட் _____ 1<br>Septic Tank / செப்டிக் டேங்க் _____ 2<br>Pit latrine / குழி டாய்லெட் _____ 3<br>Others specify/மற்றவை _____ 4<br>(குறிப்பிடுக).....               |
| H42 | How many household members use this toilet facility?<br>வீட்டில் உள்ள எத்தனை பேர் கழிப்பிட வசதியை பயன்படுத்துகிறார்கள்?                                                                | All / அனைவரும் _____ 1<br>Men/ஆண்கள் _____ 2<br>Women/பெண்கள் _____ 3<br>Children /குழந்தைகள் _____ 4                                                                                       |
| H43 | Where do you go for defecation/நீங்கள் எங்கே மலம் கழிப்பீர்கள்?                                                                                                                        | Open/திறந்தவெளி _____ 1<br>Public Toilet /பொது கழிப்பிடம் _____ 2<br>Others specify/மற்றவை _____ 3<br>(குறிப்பிடுக) .....                                                                   |
| H44 | Does your house have drainage facility?<br>உங்கள் வீட்டில் சாக்கடை வசதி உள்ளதா?                                                                                                        | Yes/ஆம் _____ 1<br>No/இல்லை _____ 2 → H46                                                                                                                                                   |
| H45 | Type of the drainage?<br>சாக்கடை வசதியின் வகை                                                                                                                                          | Closed/மூடிய வகை _____ 1<br>Open / திறந்த வகை _____ 2<br>Others / மற்றவை _____ 3                                                                                                            |
| H46 | How do you remove/dispose the household waste?<br>உங்கள் வீட்டு குப்பைகளை எவ்வாறு அப்புறப்படுத்துவீர்கள்?                                                                              | Public container/ பொது குப்பை தொட்டி _____ 1<br>Open Dump/ திறந்த வெளியில் கொட்டுதல் _____ 2<br>Other ways/மற்றவை _____ 3<br>(குறிப்பிடவும்) .....                                          |
| H47 | Did any member of this household marry in the past year 1 <sup>ST</sup> jan to 31 <sup>ST</sup> Dec 2011? கடந்த ஒரு வருடத்தில் இந்த குடும்பத்தை சார்ந்த எவருக்கேனும் திருமணம் நடந்ததா? | Yes /ஆம் _____ 1<br>No/இல்லை _____ 2 → H50                                                                                                                                                  |
| H48 | How many marriages were there from 1 <sup>ST</sup> jan to 31 <sup>ST</sup> Dec 2011? எத்தனை திருமணங்கள் நடந்தன?                                                                        | Boys/ஆண்கள் _____<br>Girls/பெண்கள் _____<br>Total/மொத்தம் _____                                                                                                                             |
| H49 | What was his/her age at the time of marriage?<br>திருமணத்தின் போது அவர்களுடைய வயது என்ன?                                                                                               | Boy _____ Girl _____<br>1 _____<br>2 _____<br>3 _____<br>4 _____                                                                                                                            |

|     |                                                                                                                                                                                  |                                            |                |                  |  |
|-----|----------------------------------------------------------------------------------------------------------------------------------------------------------------------------------|--------------------------------------------|----------------|------------------|--|
| H50 | Was there a birth in your family/household in the past year 1 <sup>ST</sup> jan to 31 <sup>ST</sup> Dec 2011? கடந்த ஒரு வருடத்தில் உங்கள் வீட்டில் ஏதேனும் பிறப்பு நடந்ததா?      | Yes/ ஆம் _____ 1<br>No/இல்லை _____ 2 → H52 |                |                  |  |
| H51 | How many births? எத்தனை பிறப்புகள்?                                                                                                                                              | Male<br>ஆண்                                | Female<br>பெண் | Total<br>மொத்தம் |  |
| H52 | Was there a death in your family/household in the past year? From 1 <sup>ST</sup> jan to 31 <sup>ST</sup> Dec 2011; கடந்த ஒரு வருடத்தில் உங்கள் வீட்டில் ஏதேனும் இறப்பு நடந்ததா? | Yes/ ஆம் _____ 1<br>No/இல்லை _____ 2 → H68 |                |                  |  |
| H53 | How many deaths? எத்தனை இறப்புகள்?                                                                                                                                               | Male<br>ஆண்                                | Female<br>பெண் | Total<br>மொத்தம் |  |



| H54                                                                                | H55                                                | H56                                                                                                                                                                                                                                                                                                                                        | H57                                                                        | H58                                                                                                                                                            | H59                                                                                                                        | H60                                                                                                                                            | H61                                                                       | H62                                                                                                                       |
|------------------------------------------------------------------------------------|----------------------------------------------------|--------------------------------------------------------------------------------------------------------------------------------------------------------------------------------------------------------------------------------------------------------------------------------------------------------------------------------------------|----------------------------------------------------------------------------|----------------------------------------------------------------------------------------------------------------------------------------------------------------|----------------------------------------------------------------------------------------------------------------------------|------------------------------------------------------------------------------------------------------------------------------------------------|---------------------------------------------------------------------------|---------------------------------------------------------------------------------------------------------------------------|
| What (was/were) the names of the persons who died?<br>இறந்தவர்களின் பெயர்கள் என்ன? | Male(=1)<br>ஆண் /<br>Female<br>பெண்(=2)<br>பாலினம் | How old was she /he when died<br>1.Enter in days if died in less than 30days(பிறந்த 30 நாட்களுக்கு முன்பாகவே இறந்திருந்தால், நாட்களில் குறுபிடுக)<br>2. Enter in months if died in less than 12 months(பிறந்த 12 மாதங்களுக்கு முன்பாகவே இறந்திருந்தால், மாதங்களில் குறுபிடுக)<br>3. others enter in years (மற்றவைகளை வருடத்தில் குறுபிடுக) | In what month and year did (N) die?<br><br>இறந்த மாதம் மற்றும் வருடம்என்ன? | Check whether deceased female aged 15-49 was at the time of death?<br><br>இறந்தது பெண்ணாக இருந்தால் இறந்த போது அவரின் வயது 15-49-க்குள் இருக்கிறதா என்பதை கவனி | If deceased was female aged 15-49 at the time of death<br>இறந்தவர் பெண்ணாக மற்றும் இறந்த போது வயது 15-49 -க்குள் இருந்தால் |                                                                                                                                                |                                                                           |                                                                                                                           |
|                                                                                    |                                                    |                                                                                                                                                                                                                                                                                                                                            |                                                                            |                                                                                                                                                                | was (name) pregnant when She died?<br>Probe:<br><br>இறக்கும் போது கர்பமாக இருந்தரா?                                        | Did (name) die at the time of abortion or within six weeks of Abortion?<br><br>கருசிதைவின் போது அல்லது கரு சிதைந்த ஆறு வாரத்திற்குள் இறந்தாரா? | Did (name) die during child birth?<br><br>குழந்தை பிறக்கும்போது இறந்தாரா? | did (name) die within six weeks of the end of pregnancy or Child birth?<br><br>குழந்தை பிறந்த ஆறு வாரத்திற்குள் இறந்தாரா? |
| 01<br><hr/> (Name)                                                                 | 1<br><br>2                                         | Days <input type="text"/><br>Months <input type="text"/><br>Years <input type="text"/>                                                                                                                                                                                                                                                     | Month <input type="text"/><br><br>Year <input type="text"/>                | Yes ---1→<br><br>No----2<br>Go to next death ↓                                                                                                                 | Yes ----1<br>Go to next Death ←<br><br>No →                                                                                | Yes-----1<br>Go to next Death ←<br><br>No →                                                                                                    | Yes-----1<br>Go to next Death ←<br><br>No →                               | Yes-----1<br><br>No-----2<br>(Go to next death)                                                                           |
| 02<br><hr/> (Name)                                                                 | 1<br><br>2                                         | Days <input type="text"/><br>Months <input type="text"/><br>Years <input type="text"/>                                                                                                                                                                                                                                                     | Month <input type="text"/><br><br>Year <input type="text"/>                | Yes ---1<br><br>No ---2<br>Go to next death ←                                                                                                                  | Yes---1<br>Go to next Death ←<br><br>No →                                                                                  | Yes---1<br>Go to next Death ←<br><br>No →                                                                                                      | Yes---1<br>Go to next death ←<br><br>No →                                 | Yes-----1<br><br>No-----2<br>Go to next death                                                                             |
| 03<br><hr/> (Name)                                                                 | 1<br><br>2                                         | Days <input type="text"/><br>Months <input type="text"/><br>Years <input type="text"/>                                                                                                                                                                                                                                                     | Month <input type="text"/><br><br>Year <input type="text"/>                | Yes---1 →<br><br>No---2<br>Go to next death ←                                                                                                                  | Yes---1<br>Go to next death ←<br><br>No →                                                                                  | Yes---1<br>Go to next death ←<br><br>No →                                                                                                      | Yes---1<br>Go to next death ←<br><br>No →                                 | Yes-----1<br><br>No-----2<br>Go to next death                                                                             |

|                            |                |                                                                                                                                                                                 |  |  |  |                                                                                                                                                  |  |  |                                                         |                                                      |                                                      |                                                       |                                                           |
|----------------------------|----------------|---------------------------------------------------------------------------------------------------------------------------------------------------------------------------------|--|--|--|--------------------------------------------------------------------------------------------------------------------------------------------------|--|--|---------------------------------------------------------|------------------------------------------------------|------------------------------------------------------|-------------------------------------------------------|-----------------------------------------------------------|
| <p>04 _____<br/>(Name)</p> | <p>1<br/>2</p> | <p>Days<br/>Months<br/>Years</p> <table border="1" style="display: inline-table; vertical-align: middle;"> <tr><td> </td></tr> <tr><td> </td></tr> <tr><td> </td></tr> </table> |  |  |  | <p>Month<br/>Year</p> <table border="1" style="display: inline-table; vertical-align: middle;"> <tr><td> </td></tr> <tr><td> </td></tr> </table> |  |  | <p>Yes---1 →<br/><br/>No<br/>Go to next death ↩</p>     | <p>Yes---1<br/>Go to next death<br/><br/>No →</p>    | <p>Yes----1 ↩<br/>Go to next death<br/><br/>No →</p> | <p>Yes-----1 ↩<br/>Go to next death<br/><br/>No →</p> | <p>Yes-----1<br/><br/>No-----2<br/>Go to next death</p>   |
|                            |                |                                                                                                                                                                                 |  |  |  |                                                                                                                                                  |  |  |                                                         |                                                      |                                                      |                                                       |                                                           |
|                            |                |                                                                                                                                                                                 |  |  |  |                                                                                                                                                  |  |  |                                                         |                                                      |                                                      |                                                       |                                                           |
|                            |                |                                                                                                                                                                                 |  |  |  |                                                                                                                                                  |  |  |                                                         |                                                      |                                                      |                                                       |                                                           |
|                            |                |                                                                                                                                                                                 |  |  |  |                                                                                                                                                  |  |  |                                                         |                                                      |                                                      |                                                       |                                                           |
|                            |                |                                                                                                                                                                                 |  |  |  |                                                                                                                                                  |  |  |                                                         |                                                      |                                                      |                                                       |                                                           |
| <p>05 _____<br/>(Name)</p> | <p>1<br/>2</p> | <p>Days<br/>Months<br/>Years</p> <table border="1" style="display: inline-table; vertical-align: middle;"> <tr><td> </td></tr> <tr><td> </td></tr> <tr><td> </td></tr> </table> |  |  |  | <p>Month<br/>Year</p> <table border="1" style="display: inline-table; vertical-align: middle;"> <tr><td> </td></tr> <tr><td> </td></tr> </table> |  |  | <p>Yes---1 →<br/><br/>No---2 ↩<br/>Go to next death</p> | <p>Yes----1 ↩<br/>Go to next Death<br/><br/>No →</p> | <p>Yes----1 ↩<br/>Go to next Death<br/><br/>No →</p> | <p>Yes-----1 ↩<br/>Go to next Death<br/><br/>No →</p> | <p>Yes-----1<br/><br/>No-----2 ↩<br/>Go to next death</p> |
|                            |                |                                                                                                                                                                                 |  |  |  |                                                                                                                                                  |  |  |                                                         |                                                      |                                                      |                                                       |                                                           |
|                            |                |                                                                                                                                                                                 |  |  |  |                                                                                                                                                  |  |  |                                                         |                                                      |                                                      |                                                       |                                                           |
|                            |                |                                                                                                                                                                                 |  |  |  |                                                                                                                                                  |  |  |                                                         |                                                      |                                                      |                                                       |                                                           |
|                            |                |                                                                                                                                                                                 |  |  |  |                                                                                                                                                  |  |  |                                                         |                                                      |                                                      |                                                       |                                                           |
|                            |                |                                                                                                                                                                                 |  |  |  |                                                                                                                                                  |  |  |                                                         |                                                      |                                                      |                                                       |                                                           |

**Ask only in case of Maternal Death**

| Q. No. | Questions and filter                                                                                                                                                                                                                            | Coding categories                                                                                                                                                                                                                                                                                                                                                                                   | For Death 1st                                                                | For Death 2 <sup>nd</sup>                                                    |
|--------|-------------------------------------------------------------------------------------------------------------------------------------------------------------------------------------------------------------------------------------------------|-----------------------------------------------------------------------------------------------------------------------------------------------------------------------------------------------------------------------------------------------------------------------------------------------------------------------------------------------------------------------------------------------------|------------------------------------------------------------------------------|------------------------------------------------------------------------------|
|        | Serial No of H54<br>வரிசை எண்                                                                                                                                                                                                                   |                                                                                                                                                                                                                                                                                                                                                                                                     | <input type="text"/>                                                         | <input type="text"/>                                                         |
| H63    | What is the parity?<br>எத்தனாவது கர்ப்பம்?                                                                                                                                                                                                      |                                                                                                                                                                                                                                                                                                                                                                                                     | <input type="text"/>                                                         | <input type="text"/>                                                         |
| H64    | How many months was she pregnant/after how many days/months of delivery did she die?<br>அவர் இறக்கும் போது எத்தனை மாத கர்ப்பிணி / பிரசவித்த பிறகு எத்தனை நாள் / மாதம் கழித்து இறந்தார்?                                                         |                                                                                                                                                                                                                                                                                                                                                                                                     | <input type="text"/>                                                         | <input type="text"/>                                                         |
| H65    | Where did the delivery/abortion take place? (maternal death during pregnancy details need not be collected)<br>பிரசவம் / கருச்சிதைவு எங்கு நடைபெற்றது?( கர்ப்பத்தின் போது இறந்த பெண்கள் பற்றிய விபரம் தேவையில்லை)                               | Sub-centre<br>துணை மையம் _____<br>PHC ஆரம்ப சுகாதார மையம் _____<br>Taluk hospital தாலுகா மருத்துவமனை _____<br>District Government hospital மாவட்ட அரசு மருத்துவமனை _____<br>Private hospital/NGO தனியார் மருத்துவமனை/ அரசு சாரா நிறுவனம் _____<br>Home / வீடு _____<br>Others / மற்றவை _____<br>.....                                                                                               | 1<br>2<br>3<br>4<br>5<br>6                                                   |                                                                              |
| H66    | How many days after delivery/abortion did she die?<br>பிரசவித்த / கருகலைப்புக்கு பிறகு எத்தனை நாட்கள் கழித்து இறந்தார்?                                                                                                                         | Died during pregnancy.<br>கர்ப்பத்தின் போது இறந்தார் _____<br>Died during delivery on the same day<br>பிரசவித்த அன்றே இறந்தார் _____<br>Days/ நாட்கள் _____                                                                                                                                                                                                                                         | 1<br>2<br><input type="text"/>                                               |                                                                              |
| H67    | During pregnancy/ before delivery/after delivery /after abortion did she suffer from any of these illnesses?<br>கர்ப்பத்தின் போது / பிரசவத்திற்கு முன்பும் / பின்பும் / கருகலைப்புக்கு பிறகும் அவருக்கு பின்வரும் சுகாதார பிரச்சனைகள் இருந்ததா? | <b>Pregnancy</b> (கர்ப்பத்தின் போது)<br>Swelling of Hands And Feet கைகள் மற்றும் கால்களில் வீக்கம் _____<br>Paleness வெளிரிய தன்மை _____<br>Visual Disturbances பார்வை தொந்தரவு _____<br>Bleeding இரத்தப்போக்கு _____<br>Convulsions வலிப்பு _____<br><br>Weak or no movement of foetus பலவீனம் அல்லது கரு இயக்கமின்மை _____<br>Abnormal position of foetus. கருவில் வழக்கத்திற்கு மாறான நிலை _____ | Yes No Dk<br>1 2 9<br>1 2 9<br>1 2 9<br>1 2 9<br>1 2 9<br><br>1 2 9<br>1 2 9 | Yes No Dk<br>1 2 9<br>1 2 9<br>1 2 9<br>1 2 9<br>1 2 9<br><br>1 2 9<br>1 2 9 |

|  |                                                                                |   |   |   |   |   |   |
|--|--------------------------------------------------------------------------------|---|---|---|---|---|---|
|  | <b>Delivery(பிரசவம்)</b>                                                       |   |   |   |   |   |   |
|  | Premature Labour குறைப் பிரசவம்_____                                           | 1 | 2 | 9 | 1 | 2 | 9 |
|  | Prolonged Labour(>12 hours) நீண்ட நேர பிரசவம்_____                             | 1 | 2 | 9 | 1 | 2 | 9 |
|  | Breech Presentation தலை திரும்பி பிறத்தல்_____                                 | 1 | 2 | 9 | 1 | 2 | 9 |
|  | <b>Post Delivery / Abortion</b>                                                |   |   |   |   |   |   |
|  | High fever அதிக காய்ச்சல்_____                                                 | 1 | 2 | 9 | 1 | 2 | 9 |
|  | Lower abdominal pain கீழ் வயிற்று வலி_____                                     | 1 | 2 | 9 | 1 | 2 | 9 |
|  | Foul smelling vaginal discharge துர்நாற்றமுடைய வெள்ளை படுதல் / சீழ்படுதல்_____ | 1 | 2 | 9 |   |   |   |
|  | Excessive Bleeding அதிக ரத்தபோக்கு_____                                        | 1 | 2 | 9 | 1 | 2 | 9 |
|  | Dizziness மயக்க உணர்வு_____                                                    | 1 | 2 | 9 | 1 | 2 | 9 |
|  | Severe Headache கடுமையான தலைவலி_____                                           | 1 | 2 | 9 | 1 | 2 | 9 |
|  |                                                                                |   |   |   | 1 | 2 | 9 |
|  |                                                                                |   |   |   | 1 | 2 | 9 |

| Out-Migration / இடம்பெயர்தல் |                                                                                                                                                                                                                                                           |                                        |          |                                                                                                                 |                                                                                                                                         |                                                                                           |                                                |
|------------------------------|-----------------------------------------------------------------------------------------------------------------------------------------------------------------------------------------------------------------------------------------------------------|----------------------------------------|----------|-----------------------------------------------------------------------------------------------------------------|-----------------------------------------------------------------------------------------------------------------------------------------|-------------------------------------------------------------------------------------------|------------------------------------------------|
|                              | H68                                                                                                                                                                                                                                                       | H69                                    | H70      | H71                                                                                                             | H72                                                                                                                                     | H73                                                                                       | H74                                            |
| L. No                        | Name of the member/s of this family who live/s outside (including women and children)(minimum one year and above)இந்த குடும்பத்தை சார்ந்த, வெளியில் வசிக்கும் நபரின் பெயர்கள்(பெண்கள் மற்றும் குழந்தைகள் உட்பட)(குறைபட்சம் ஒரு வருடம் அல்லது அதற்கு மேல்) | Sex Male-1 Female-2 பாலினம் ஆண் - பெண் | Age வயது | Name of the district/state this person is currently residing at தற்சமயம் இந்த நபர் வசிக்கும் மாவட்டம் / மாநிலம் | Date and month on which this person left this village permanently இந்த நபர் நிரந்திரமாக கிராமத்தை விட்டு வெளியேறிய வருடம் மற்றும் மாதம் | What is the frequency of their visit? எவ்வளவு நாளைக்கு ஒரு முறை வீட்டிற்கு வந்து செல்வர்? | Reason for migration? இடம் பெயர்ந்ததின் காரணம் |
|                              |                                                                                                                                                                                                                                                           |                                        |          |                                                                                                                 |                                                                                                                                         |                                                                                           |                                                |
|                              |                                                                                                                                                                                                                                                           |                                        |          |                                                                                                                 |                                                                                                                                         |                                                                                           |                                                |
|                              |                                                                                                                                                                                                                                                           |                                        |          |                                                                                                                 |                                                                                                                                         |                                                                                           |                                                |
|                              |                                                                                                                                                                                                                                                           |                                        |          |                                                                                                                 |                                                                                                                                         |                                                                                           |                                                |
|                              |                                                                                                                                                                                                                                                           |                                        |          |                                                                                                                 |                                                                                                                                         |                                                                                           |                                                |
|                              |                                                                                                                                                                                                                                                           |                                        |          |                                                                                                                 |                                                                                                                                         |                                                                                           |                                                |

1. Employment (வேலை வாய்ப்பு) 2. Seasonal employment (பருவ கால வேலை வாய்ப்பு) 3. Education (கல்வி)



### SATISFACTION WITH HEALTH FACILITY – H81

In the past 30 days did you visit any of the following health centers?

கடந்த 30 நாட்களில் கீழ்க்கண்ட ஏதேனும் நலமையதிற்கு சென்றீர்களா?

Yes ஆம் No இல்லை

|                                          |   |   |
|------------------------------------------|---|---|
| Health Sub center?<br>துணை சுகாதார மையம் | 1 | 2 |
| PHC?<br>ஆரம்ப சுகாதார மையம்              | 1 | 2 |
| Taluk Hospital<br>தாலுகா மருத்துவமனை     | 1 | 2 |
| Government Hospital<br>அரசு மருத்துவமனை  | 1 | 2 |
| Private Hospital<br>தனியார் வைத்தியசாலை  | 1 | 2 |
| Private Doctor<br>தனியார் மருத்துவர்     | 1 | 2 |
| NGO Hospital<br>அரசு சாரா நிறுவனம்       | 1 | 2 |
| Traditional healer<br>நாட்டு வைத்தியர்   | 1 | 2 |

How will you rate the health facility that you visited last on the following criteria?

கடைசியாக சென்ற நல மையத்தை எவ்வாறு மதிப்பிடுவீர்கள்?

| Q. No | Statement கூற்று                                                                               | Bad மோசம் | Ok சுமார் | Good நன்று   |
|-------|------------------------------------------------------------------------------------------------|-----------|-----------|--------------|
| H82   | Location அமைவிட வசதி                                                                           | 1         | 2         | 3            |
| H83   | Waiting time காத்திருக்கும் நேரம்                                                              | Long 1    | Average 2 | No waiting 3 |
| H84   | Manners of the physician மருத்துவர் தங்களிடம் நடந்துகொள்ளும் விதம்                             | 1         | 2         | 3            |
| H85   | Talent/Skill of the physician மருத்துவரின் திறமை                                               | 1         | 2         | 3            |
| H86   | Manners of the nurse நர்ஸ் தங்களிடம் நடந்துகொள்ளும் விதம்                                      | 1         | 2         | 3            |
| H87   | Talent/skill of the nurse நர்ஸின் திறமை                                                        | 1         | 2         | 3            |
| H88   | Talent/skill of the supporting staff அங்கு வேலை செய்யும் மற்றவர்களின் திறமை                    | 1         | 2         | 3            |
| H89   | Manners of the supporting staff அங்கு வேலை செய்யும் மற்றவர்களின் நடத்தை                        | 1         | 2         | 3            |
| H90   | Explanation of the treatment உங்களுக்கு என்ன செய்தார்கள் என்பதை பற்றிய விளக்கம்                | 1         | 2         | 3            |
| H91   | Diagnostic and surgical instruments மருத்துவ அறுவை சிகிச்சை மற்றும் நோய் கண்டறியும் உபகரணங்கள் | 1         | 2         | 3            |

Self perception தன் உணர்வு

| Q.No | Your perception about the following கீழ்க்கண்டவை பற்றி உங்களுடைய தன் உணர்வு என்ன?            | Bad                                                                                                       | OK | Good | Reason |
|------|----------------------------------------------------------------------------------------------|-----------------------------------------------------------------------------------------------------------|----|------|--------|
| H92  | Health / உடல்நிலை                                                                            | 1                                                                                                         | 2  | 3    |        |
| H93  | Education / கல்வி                                                                            | 1                                                                                                         | 2  | 3    |        |
| H94  | Income / வருமானம்                                                                            | 1                                                                                                         | 2  | 3    |        |
| H95  | Employment / வேலைவாய்ப்பு                                                                    | 1                                                                                                         | 2  | 3    |        |
| H96  | Household facilities / வீட்டுவசதி                                                            | 1                                                                                                         | 2  | 3    |        |
| H97  | Water facilities / தண்ணீர் வசதி                                                              | 1                                                                                                         | 2  | 3    |        |
| H98  | Drainage facilities / சாக்கடை வசதி                                                           | 1                                                                                                         | 2  | 3    |        |
| H99  | Hygiene facility / சுகாதார வசதி                                                              | 1                                                                                                         | 2  | 3    |        |
| H100 | Smoking/புகை பிடித்தல்                                                                       | 1                                                                                                         | 2  | 3    |        |
| H101 | Drinking/மது அருந்துதல்                                                                      | 1                                                                                                         | 2  | 3    |        |
| H102 | Tobacco Chewing/புகையிலை                                                                     | 1                                                                                                         | 2  | 3    |        |
| H103 | Peoples participation in community development/சமூக முன்னேற்றத்துக்கு மக்களின் பங்கெடுப்பு   | 1                                                                                                         | 2  | 3    |        |
| H104 | Recreation time / பொழுதுபோக்கு நேரம்                                                         | 1                                                                                                         | 2  | 3    |        |
| H105 | Leisure time / ஓய்வு நேரம்                                                                   | 1                                                                                                         | 2  | 3    |        |
| H106 | Who do you think has more leisure time? யாருக்கு அதிக ஓய்வு நேரம் இருப்பதாக நினைக்கிறீர்கள்? | Men ஆண்கள் _____ 1<br>Women பெண்கள் _____ 2<br>Children குழந்தைகள் _____ 3<br>Elderly முதியவர்கள் _____ 4 |    |      |        |
